# Supplementary material
Source: PubMed Central journal article supplement (PMC3078662)
Supplement: supp_18.3.267_JAMIA_Appendix2_000049.pdf [file supp_18.3.267_JAMIA_Appendix2_000049.pdf]

APPENDIX 2: QUALITATIVE DATA PROTOCOLS

**Baseline Interview Questions  
for Steinbach Family Medical Centre  
CPOE participants**

1. What challenges do you think will arise by participating in CPOE?
2. What could the project do to address those challenges?
3. What benefits do you think will accrue from participating?
4. What other comments would like to make?

APPENDIX 2: QUALITATIVE DATA PROTOCOLS

On a scale of 1 to 10, with 10 being the **best**, please respond to the following questions by circling the number that reflects your view.

**Low** **High**

**How confident are you that all your DI ordering is appropriate?**      1 2 3 4 5 6 7 8 9 10

**How satisfied are you with the current DI ordering process at the Clinic?**      1 2 3 4 5 6 7 8 9 10

**Do you have enough information on the project?  
What do you want to know more about?  
What questions do you have?**

1.      1 2 3 4 5 6 7 8 9 10

2.

3.

**How has the project implementation been going so far in your opinion?**      1 2 3 4 5 6 7 8 9 10

**Additional comments:**

**Name:**

**Date:**

**Mid project Evaluation**  
**Interview Questions for Steinbach Family Medical Centre physicians**

1. What challenges have arisen?
  
2. What could/did the project do to address those challenges?
  
3. What benefits have accrued from participating?
  
4. Do you have any suggestions for improving your workflow in relation to this project?
  
5. Are you willing to put your DI orders thru SmartReq decision support system for the remaining 3 months?

Yes

Perhaps

No

Why?

6. What other comments would you like to make?

## APPENDIX 2: QUALITATIVE DATA PROTOCOLS

## APPENDIX 2: QUALITATIVE DATA PROTOCOLS

On a scale of 1 to 10 with **10 being the best**, please respond to the following questions by circling the number that reflects your view.

|                                                                                            | <b>Low</b> |   |   |   |   |   |   |   |   |    | <b>High</b> |
|--------------------------------------------------------------------------------------------|------------|---|---|---|---|---|---|---|---|----|-------------|
| <b>Do you find the electronic updates on your personal ordering useful or interesting?</b> | 1          | 2 | 3 | 4 | 5 | 6 | 7 | 8 | 9 | 10 |             |

|                                                                                                                  |   |   |   |   |   |   |   |   |   |    |
|------------------------------------------------------------------------------------------------------------------|---|---|---|---|---|---|---|---|---|----|
| <b>Do you find the CME sessions with Dr Reed on DI ordering in specific circumstances useful or interesting?</b> | 1 | 2 | 3 | 4 | 5 | 6 | 7 | 8 | 9 | 10 |
|------------------------------------------------------------------------------------------------------------------|---|---|---|---|---|---|---|---|---|----|

|                                                       |   |   |   |   |   |   |   |   |   |    |
|-------------------------------------------------------|---|---|---|---|---|---|---|---|---|----|
| <b>Do you have enough information on the project?</b> | 1 | 2 | 3 | 4 | 5 | 6 | 7 | 8 | 9 | 10 |
|-------------------------------------------------------|---|---|---|---|---|---|---|---|---|----|

|                                                                            |   |   |   |   |   |   |   |   |   |    |
|----------------------------------------------------------------------------|---|---|---|---|---|---|---|---|---|----|
| <b>Have your problems with implementation been dealt with effectively?</b> | 1 | 2 | 3 | 4 | 5 | 6 | 7 | 8 | 9 | 10 |
|----------------------------------------------------------------------------|---|---|---|---|---|---|---|---|---|----|

|                                                              |   |   |   |   |   |   |   |   |   |    |
|--------------------------------------------------------------|---|---|---|---|---|---|---|---|---|----|
| <b>Have your interactions with Medicalis met your needs?</b> | 1 | 2 | 3 | 4 | 5 | 6 | 7 | 8 | 9 | 10 |
|--------------------------------------------------------------|---|---|---|---|---|---|---|---|---|----|

|                                                                    |   |   |   |   |   |   |   |   |   |    |
|--------------------------------------------------------------------|---|---|---|---|---|---|---|---|---|----|
| <b>Have your interactions with project members met your needs?</b> | 1 | 2 | 3 | 4 | 5 | 6 | 7 | 8 | 9 | 10 |
|--------------------------------------------------------------------|---|---|---|---|---|---|---|---|---|----|

**Additional comments:**

**Name:**

**Date:**

**Submit to: <name of interviewer> during interview.**

**Post-project Evaluation**  
**Interview Questions for Steinbach Family Medical Centre Physicians**

1. What challenges have arisen?
2. What did the project manager do to correct these challenges?'
3. To what extent were these efforts successful in correcting or solving the challenges?'
4. What benefits accrued from participating?
5. As part of the concluding documentation we have to make recommendations to government and the software vendor. What advice would you give in regards to future implementation:
  - 1- To Manitoba Health and Healthy Living?
  - 2- To Health Canada?
  - 3- To Medicalis?
6. What would you recommend as immediate next steps for CAR to pursue in this area?
7. If the software worked would you agree to using a decision support tool before ordering DI for your patients?

Why?                      Yes                      Perhaps                      No

APPENDIX 2: QUALITATIVE DATA PROTOCOLS

8. What other comments would you like to make?

Analogue Scale for Post Project Evaluations at Steinbach Family Medical Center

On a scale of 1 to 10 with **10 being the best**, please respond to the following questions by circling the number that reflects your view.

|                                                                                                                                       | Low |     |     |     |     |     |     |     |     |      | High |
|---------------------------------------------------------------------------------------------------------------------------------------|-----|-----|-----|-----|-----|-----|-----|-----|-----|------|------|
| 1. Did you find the electronic updates on your personal ordering overall beneficial?                                                  | 1   | 2   | 3   | 4   | 5   | 6   | 7   | 8   | 9   | 10   |      |
| 2. Did you find the CME sessions with Dr Reed on DI ordering in specific circumstances beneficial?                                    | 1   | 2   | 3   | 4   | 5   | 6   | 7   | 8   | 9   | 10   |      |
| 3. Did you have enough information throughout the project?                                                                            | 1   | 2   | 3   | 4   | 5   | 6   | 7   | 8   | 9   | 10   |      |
| 4. How satisfied were you with Drs Curry and Reed responses to your expressed needs throughout the project?                           | 1   | 2   | 3   | 4   | 5   | 6   | 7   | 8   | 9   | 10   |      |
| 5. How satisfied were you with Medicalis' response to your expressed needs during the project?                                        | 1   | 2   | 3   | 4   | 5   | 6   | 7   | 8   | 9   | 10   |      |
| 6. When needed have you received the responses you needed from the project team members?                                              | 1   | 2   | 3   | 4   | 5   | 6   | 7   | 8   | 9   | 10   |      |
| 7. Have you done your best to try out this clinical decision support software?                                                        | 1   | 2   | 3   | 4   | 5   | 6   | 7   | 8   | 9   | 10   |      |
| 8. What percentage of your DI orders were you putting through SmartReq the last month?                                                | 10% | 20% | 30% | 40% | 50% | 60% | 70% | 80% | 90% | 100% |      |
| 9. When you got advice to something different than what you initially ordered, what percentage of the time did you follow the advice? | 10% | 20% | 30% | 40% | 50% | 60% | 70% | 80% | 90% | 100% |      |

APPENDIX 2: QUALITATIVE DATA PROTOCOLS

Additional comments:

Name:

Date:

Submit to: *<name and email of interviewer>*
