# Supplementary material
Source: PubMed Central journal article supplement (PMC3078662)
Supplement: supp_18.3.267_JAMIA_Appendix4_000049.pdf [file supp_18.3.267_JAMIA_Appendix4_000049.pdf]

## APPENDIX 4: Orders Changed After Prompt

| Case | Relevant CAR rule                            | Original Procedure   | Changed Procedure  | Indications                                                                                                                                                                                                                                                  |
|------|----------------------------------------------|----------------------|--------------------|--------------------------------------------------------------------------------------------------------------------------------------------------------------------------------------------------------------------------------------------------------------|
| 1    | E04 Pulmonary Embolism                       | X-ray Chest          | CT Chest           | Please select one of the following to provide information about relevant prior imaging. : Abnormal                                                                                                                                                           |
| 2    | C02 Myelopathy                               | X-ray Cervical Spine | MR Entire Spine    | N/A                                                                                                                                                                                                                                                          |
| 3    | D19/D20/D21/J21 Knee Pain                    | MR Knee              | X-ray Knee AP/Lat  | Has the patient experienced recent knee trauma? : No                                                                                                                                                                                                         |
|      | D19/D20/D21/J21 Knee Pain                    | MR Knee              | X-ray Knee AP/Lat  | Please select one of the following to provide information about relevant prior imaging. : None                                                                                                                                                               |
| 4    | E08/H02/H03/H16/H17/H18 Hypertension         | US Renal             | MRA Abdomen        | Is the current imaging request a presurgical investigation for a patient with known renal artery stenosis? : No                                                                                                                                              |
| 5    | B06/J27/J28/J29/L26/L31 Foreign Body         | X-ray Chest          | X-ray Chest PA/Lat | Can the ingested foreign body be considered to be sharp or potentially poisonous? : No                                                                                                                                                                       |
| 6    | C06/C07/C08 Lumbar Spine Pain                | X-ray Lumbar Spine   | MR Lumbar Spine    | Please categorize the patient using one of the following scenarios: : Persistent Symptoms after Conservative Therapy (4-6 weeks)                                                                                                                             |
| 7    | C06/C07/C08 Lumbar Spine Pain                | X-ray Lumbar Spine   | MR Lumbar Spine    | Please categorize the patient using one of the following scenarios: : Severe symptoms where management is difficult                                                                                                                                          |
| 8    | D19/D20/D21/J21 Knee Pain                    | X-ray Knee           | MR Knee            | Please indicate whether there was relevant prior imaging. : None                                                                                                                                                                                             |
|      | D19/D20/D21/J21 Knee Pain                    | X-ray Knee           | MR Knee            | Has the patient experienced recent knee trauma? : No                                                                                                                                                                                                         |
|      | D19/D20/D21/J21 Knee Pain                    | X-ray Knee           | MR Knee            | Is the patient experiencing any locking or limited range of motion in the knee? : No                                                                                                                                                                         |
|      | D19/D20/D21/J21 Knee Pain                    | X-ray Knee           | MR Knee            | Please select one of the following clinical conditions: : Planning arthroscopy or other knee surgery                                                                                                                                                         |
| 9    | L43 Pediatric Proven Urinary Tract Infection | US Renal             | NM Renal           | Prior to imaging, a culture-positive clean specimen *(see definition) should be obtained. Definition: Clean Specimen: mid-stream clean capture or catheterized specimen. Most recent urinalysis results: : Culture positive (Proven Urinary Tract Infection) |

|    |                                               |                     |                    |                                                                                                                                                                                                                                                                 |
|----|-----------------------------------------------|---------------------|--------------------|-----------------------------------------------------------------------------------------------------------------------------------------------------------------------------------------------------------------------------------------------------------------|
|    | L43 Pediatric Proven Urinary Tract Infection  | US Renal            | NM Renal           | Please select primary intent of imaging: : (NM) Rule out renal scarring from previous urinary tract infections                                                                                                                                                  |
| 10 | H14 Scrotal Mass or Pain                      | US Testicular       | US Scrotal         | N/A                                                                                                                                                                                                                                                             |
|    | I06/I07/K39 Suspected Pelvic Mass             | CT Pelvis           | US Pelvis          | Please indicate whether there was relevant prior imaging. : None                                                                                                                                                                                                |
| 11 | C06/C07/C08 Lumbar Spine Pain                 | CT Lumbar Spine     | MR Lumbar Spine    | Please categorize the patient using one of the following scenarios: : Persistent Symptoms after Conservative Therapy (4-6 weeks)                                                                                                                                |
| 12 | F06/F07 Acute Exacerbations of Asthma or COPD | X-ray Chest         | X-ray Chest PA/Lat | With respect to the current patient encounter are any of the following imaging indicators present? - Current life-threatening exacerbation from asthma - Failure to adequately respond to a recent treatment - Patient has localizing signs in the chest - Pati |
| 13 | C06/C07/C08 Lumbar Spine Pain                 | CT Lumbar Spine     | MR Lumbar Spine    | Please categorize the patient using one of the following scenarios: : Persistent Symptoms after Conservative Therapy (4-6 weeks)                                                                                                                                |
| 14 | D19/D20/D21/J21 Knee Pain                     | MR Knee             | X-ray Knee AP/Lat  | Please indicate whether there was relevant prior imaging. : None                                                                                                                                                                                                |
|    | D19/D20/D21/J21 Knee Pain                     | MR Knee             | X-ray Knee AP/Lat  | Is the patient experiencing any locking or limited range of motion in the knee? : Yes                                                                                                                                                                           |
|    | D19/D20/D21/J21 Knee Pain                     | MR Knee             | X-ray Knee AP/Lat  | Has the patient experienced recent knee trauma? : No                                                                                                                                                                                                            |
| 15 | A13/L09 Sinus Disease                         | X-ray Sinuses       | CT Sinuses         | Do you specifically suspect malignancy? : No                                                                                                                                                                                                                    |
|    | A13/L09 Sinus Disease                         | X-ray Sinuses       | CT Sinuses         | Do you suspect that the patient may develop further complications (such as orbital cellulitis)? : No                                                                                                                                                            |
|    | A13/L09 Sinus Disease                         | X-ray Sinuses       | CT Sinuses         | Would you consider the patient to have failed maximal medical treatment? : Yes                                                                                                                                                                                  |
|    | A13/L09 Sinus Disease                         | X-ray Sinuses       | CT Sinuses         | Has the patient been clinically diagnosed with sinusitis and treated for more than 10 days? : Yes                                                                                                                                                               |
| 16 | M01 Breast Imaging                            | Screening Mammogram | MR Breast          | N/A                                                                                                                                                                                                                                                             |
| 17 | C06/C07/C08 Lumbar Spine Pain                 | CT Lumbar Spine     | MR Lumbar Spine    | Please categorize the patient using one of the following scenarios: : Persistent Symptoms after Conservative Therapy (4-6 weeks)                                                                                                                                |
| 18 | D24 Heel Pain                                 | X-ray Foot          | MR Foot            | Many cases of heel pain will resolve over time via conservative methods (biomechanical and anti-inflammatory methods). Has the patient been through a course of conservative care? : Yes                                                                        |

|    |                                                  |                    |                 |                                                                                                                                                                                          |
|----|--------------------------------------------------|--------------------|-----------------|------------------------------------------------------------------------------------------------------------------------------------------------------------------------------------------|
| 19 | C06/C07/C08 Lumbar Spine Pain                    | X-ray Lumbar Spine | MR Lumbar Spine | N/A                                                                                                                                                                                      |
| 20 | D24 Heel Pain                                    | X-ray Foot         | MR Foot         | Many cases of heel pain will resolve over time via conservative methods (biomechanical and anti-inflammatory methods). Has the patient been through a course of conservative care? : Yes |
| 21 | C06/C07/C08 Lumbar Spine Pain                    | CT Sacrum/Coccyx   | MR Lumbar Spine | Please categorize the patient using one of the following scenarios: : Persistent Symptoms after Conservative Therapy (4-6 weeks)                                                         |
| 22 | C02 Myelopathy                                   | CT Lumbar Spine    | MR Lumbar Spine | N/A                                                                                                                                                                                      |
| 23 | A04 Demyelinating and other White Matter Disease | CT Head            | MR Brain        | N/A                                                                                                                                                                                      |
| 24 | C06/C07/C08 Lumbar Spine Pain                    | X-ray Lumbar Spine | MR Lumbar Spine | N/A                                                                                                                                                                                      |
| 25 | C06/C07/C08 Lumbar Spine Pain                    | X-ray Lumbar Spine | CT Lumbar Spine | Please specify the type of back pain the patient is presenting with. (Select one) : Chronic                                                                                              |
|    | C06/C07/C08 Lumbar Spine Pain                    | X-ray Lumbar Spine | CT Lumbar Spine | Please categorize the patient using one of the following scenarios: : Persistent Symptoms after Conservative Therapy (4-6 weeks)                                                         |
| 26 | C06/C07/C08 Lumbar Spine Pain                    | X-ray Lumbar Spine | MR Lumbar Spine | Please categorize the patient using one of the following scenarios: : Persistent Symptoms after Conservative Therapy (4-6 weeks)                                                         |
