# Supplementary material
Source: PubMed Central journal article supplement (PMC3078662)
Supplement: supp_18.3.267_JAMIA_Appendix5_000049.pdf [file supp_18.3.267_JAMIA_Appendix5_000049.pdf]

## APPENDIX 5: Orders Unchanged after prompt

| Case | rule name                                    | Procedure               | Indication                                                                                                                                                                                                                                                   |
|------|----------------------------------------------|-------------------------|--------------------------------------------------------------------------------------------------------------------------------------------------------------------------------------------------------------------------------------------------------------|
| 1    | C06/C07/C08 Lumbar Spine Pain                | X-ray Sacroiliac Joints | Degenerative Disease                                                                                                                                                                                                                                         |
| 2    | L27 Pediatric Wheeze                         | X-ray Chest             | Pneumonia                                                                                                                                                                                                                                                    |
| 3    | J22/J23/J24 Ankle and Foot Injury            | X-ray Foot              | Is there bony tenderness at the posterior edge or tip of either malleolus? : No                                                                                                                                                                              |
| 4    | C06/C07/C08 Lumbar Spine Pain                | X-ray Lumbar Spine      | Does the patient suffer from any of the following serious features? - Sx Neurological deficit - Sx Sciatica - Sx Bladder/Bowel Dysfunction : No                                                                                                              |
| 5    | G32/G33 Pancreatitis                         | CT Abdomen              | Please indicate whether there was relevant prior imaging. : None                                                                                                                                                                                             |
| 6    | H06/H07/H09 Renal Calculi and Obstruction    | US Pelvis               | Please indicate whether there was relevant prior imaging. : None                                                                                                                                                                                             |
| 7    | E08/H02/H03/H16/H17/H18 Hypertension         | US Abdomen              | Ruptured Aneurysm                                                                                                                                                                                                                                            |
| 8    | D19/D20/D21/J21 Knee Pain                    | X-ray Knee              | Please indicate whether there was relevant prior imaging. : None                                                                                                                                                                                             |
| 9    | E08/H02/H03/H16/H17/H18 Hypertension         | X-ray Chest             | Congestive Heart Failure                                                                                                                                                                                                                                     |
| 10   | L27 Pediatric Wheeze                         | X-ray Chest             | Pneumonia                                                                                                                                                                                                                                                    |
| 11   | H01 Hematuria                                | MR Kidneys              | Hepatic/Renal Cyst                                                                                                                                                                                                                                           |
| 12   | A06/A07 Headache                             | CT Head                 | Do you specifically suspect either of the following?<br>Select one. : Neither                                                                                                                                                                                |
| 13   | H06/H07/H09 Renal Calculi and Obstruction    | US Pelvis               | Please indicate whether there was relevant prior imaging. : None                                                                                                                                                                                             |
| 14   | L23 Pediatric Acute Chest Infection          | X-ray Chest             | Pneumonia                                                                                                                                                                                                                                                    |
| 15   | L43 Pediatric Proven Urinary Tract Infection | NM Renal                | Prior to imaging, a culture-positive clean specimen *(see definition) should be obtained. Definition: Clean Specimen: mid-stream clean capture or catheterized specimen. Most recent urinalysis results: : Culture positive (Proven Urinary Tract Infection) |
| 16   | H06/H07/H09 Renal Calculi and Obstruction    | US Renal                | Do you have a clinical suspicion of obstructive uropathy?<br>: No                                                                                                                                                                                            |
| 17   | H14 Scrotal Mass or Pain                     | US Scrotal              | Epididymal Cysts/Tumor                                                                                                                                                                                                                                       |
| 18   | D24 Heel Pain                                | X-ray Foot              | Many cases of heel pain will resolve over time via conservative methods (biomechanical and anti-inflammatory methods). Has the patient been through a course of conservative care? : No                                                                      |

|    |                                           |                    |                                                                                                                                                                                              |
|----|-------------------------------------------|--------------------|----------------------------------------------------------------------------------------------------------------------------------------------------------------------------------------------|
| 19 | F05/F08/F09 Upper Respiratory Infection   | X-ray Chest        | Please select from the following the condition that best applies. : Suspect upper respiratory tract infection                                                                                |
| 20 | D19/D20/D21/J21 Knee Pain                 | MR Knee            | Other: Tear                                                                                                                                                                                  |
| 21 | D24 Heel Pain                             | X-ray Foot         | Many cases of heel pain will resolve over time via conservative methods (biomechanical and anti-inflammatory methods). Has the patient been through a course of conservative care? : Yes     |
| 22 | D19/D20/D21/J21 Knee Pain                 | MR Knee            | Please indicate whether there was relevant prior imaging. : Normal                                                                                                                           |
| 23 | D23 Hallux Valgus                         | X-ray Toes         | Is the current imaging request for the presurgical assessment for bunion removal? : No                                                                                                       |
| 24 | D19/D20/D21/J21 Knee Pain                 | X-ray Knee         | Please indicate whether there was relevant prior imaging. : None                                                                                                                             |
| 25 | G32/G33 Pancreatitis                      | US Abdomen         | Please indicate whether there was relevant prior imaging. : None                                                                                                                             |
| 26 | E08/H02/H03/H16/H17/H18 Hypertension      | CT Kidneys         | Hydronephrosis                                                                                                                                                                               |
| 27 | L23 Pediatric Acute Chest Infection       | X-ray Chest        | Pneumonia                                                                                                                                                                                    |
| 28 | C01/L02 Congenital Disorders of the Spine | CT Lumbar Spine    | Is the primary intent of imaging to delineate bone detail? : Yes                                                                                                                             |
| 29 | F10 Pleural Effusion                      | X-ray Chest        | Pleural Effusion                                                                                                                                                                             |
| 30 | C04/C05/D09 Spine Degenerative Disease    | MR Thoracic Spine  | Do any of the following conditions apply?<br>- Clinical Presence of Neurological Signs<br>- Suspicion of Metastases<br>- Suspicion of Infection<br>- Suspicion of Osteoporotic Collapse : No |
| 31 | E08/H02/H03/H16/H17/H18 Hypertension      | US Abdomen         | Inflammatory Bowel Disease                                                                                                                                                                   |
| 32 | H06/H07/H09 Renal Calculi and Obstruction | US Renal           | Please indicate whether there was relevant prior imaging. : None                                                                                                                             |
| 33 | E08/H02/H03/H16/H17/H18 Hypertension      | X-ray Chest        | Pulmonary Edema                                                                                                                                                                              |
| 34 | E08/H02/H03/H16/H17/H18 Hypertension      | US Renal           | Hydronephrosis                                                                                                                                                                               |
| 35 | C06/C07/C08 Lumbar Spine Pain             | X-ray Lumbar Spine | Please categorize the patient using one of the following scenarios: : Persistent Symptoms after Conservative Therapy (4-6 weeks)                                                             |
| 36 | C06/C07/C08 Lumbar Spine Pain             | CT Lumbar Spine    | Please specify the type of back pain the patient is presenting with. (Select one) : Acute                                                                                                    |
| 37 | E08/H02/H03/H16/H17/H18 Hypertension      | US Abdomen         | Gallstones                                                                                                                                                                                   |

|    |                                           |                    |                                                                                                                                                                                         |
|----|-------------------------------------------|--------------------|-----------------------------------------------------------------------------------------------------------------------------------------------------------------------------------------|
| 38 | D19/D20/D21/J21 Knee Pain                 | X-ray Knee         | Please select one of the following to provide information about relevant prior imaging. : None                                                                                          |
| 39 | H06/H07/H09 Renal Calculi and Obstruction | US Renal           | Do you have a clinical suspicion of obstructive uropathy? : No                                                                                                                          |
| 40 | C04/C05/D09 Spine Degenerative Disease    | CT Lumbar Spine    | Degenerative Disease                                                                                                                                                                    |
| 41 | D19/D20/D21/J21 Knee Pain                 | X-ray Knee         | Has the patient experienced recent knee trauma? : No                                                                                                                                    |
| 42 | D19/D20/D21/J21 Knee Pain                 | X-ray Knee         | Has the patient experienced recent knee trauma? : No                                                                                                                                    |
| 43 | D19/D20/D21/J21 Knee Pain                 | X-ray Knee         | Has the patient experienced recent knee trauma? : No                                                                                                                                    |
| 44 | D24 Heel Pain                             | X-ray Foot         | Many cases of heel pain will resolve over time via conservative methods (biomechanical and anti-inflammatory methods). Has the patient been through a course of conservative care? : No |
| 45 | E04 Pulmonary Embolism                    | X-ray Chest        | Please select one of the following to provide information about relevant prior imaging. : Normal                                                                                        |
| 46 | C06/C07/C08 Lumbar Spine Pain             | X-ray Lumbar Spine | Please categorize the patient using one of the following scenarios: : Persistent Symptoms after Conservative Therapy (4-6 weeks)                                                        |
| 47 | C02 Myelopathy                            | CT Cervical Spine  | Disc Herniation                                                                                                                                                                         |
| 48 | C02 Myelopathy                            | MR Entire Spine    | N/A                                                                                                                                                                                     |
| 49 | D19/D20/D21/J21 Knee Pain                 | MR Knee            | Is the patient experiencing any locking or limited range of motion in the knee? : Yes                                                                                                   |
| 50 | G30 Biliary Disease                       | CT Abdomen         | Please select one of the following to provide information about relevant prior imaging. : Abnormal                                                                                      |
| 51 | A11/A12/L05 Ear Problems                  | CT Head            | Other: brainstem                                                                                                                                                                        |
| 52 | E04 Pulmonary Embolism                    | X-ray Chest        | Please select one of the following to provide information about relevant prior imaging. : Abnormal                                                                                      |
| 53 | E04 Pulmonary Embolism                    | X-ray Chest        | Please select one of the following to provide information about relevant prior imaging. : Abnormal                                                                                      |
| 54 | F04 Routine Pre-operative CXR             | X-ray Chest        | Is the patient undergoing planned cardiothoracic surgery in the near future? : No                                                                                                       |
| 55 | #N/A =CAR rule no longer linkable to case | X-ray Lumbar Spine | Disc Herniation                                                                                                                                                                         |
| 56 | #N/A                                      | X-ray Knee         | Meniscus Injury(Type : Tear)                                                                                                                                                            |
| 57 | #N/A                                      | CT Sinuses         | Sinusitis(Stage : Recurrent)                                                                                                                                                            |
| 58 | #N/A                                      | CT Abdomen         | Crohn's Disease                                                                                                                                                                         |
| 59 | #N/A                                      | MR Knee            | Joint Impingement(Type : Soft Tissue)                                                                                                                                                   |
| 60 | #N/A                                      | CT Chest           | N/A                                                                                                                                                                                     |
| 61 | #N/A                                      | US Abdomen         | Gallstones                                                                                                                                                                              |

|    |      |                     |                                                |
|----|------|---------------------|------------------------------------------------|
| 62 | #N/A | CT Lumbar Spine     | Pain(Duration : Acute)                         |
| 63 | #N/A | X-ray Lumbar Spine  | Pain(Duration : Acute)                         |
| 64 | #N/A | X-ray Abdomen       | Constipation                                   |
| 65 | #N/A | CT Head             | Other: neurology                               |
| 66 | #N/A | CT Sinuses          | Polyyps                                        |
| 67 | #N/A | X-ray Foot          | Inability to Bear Weight                       |
| 68 | #N/A | X-ray Sacrum/Coccyx | Fracture                                       |
| 69 | #N/A | X-ray Lumbar Spine  | Neurological Deficit(Specify : Focal)          |
| 70 | #N/A | X-ray Foot          | Fracture                                       |
| 71 | #N/A | X-ray Chest         | Asthma                                         |
| 72 | #N/A | CT Lumbar Spine     | Claudication                                   |
| 73 | #N/A | US Knee             | Meniscus Injury(Type : Cyst)                   |
| 74 | #N/A | CT Abdomen          | Other: possible colon tumor                    |
| 75 | #N/A | X-ray Chest         | Metastatic Disease                             |
| 76 | #N/A | MR Shoulder         | Joint Impingement(Type : Soft Tissue)          |
| 77 | #N/A | X-ray Knee          | Arthritis(Type : Osteoarthritis)               |
| 78 | #N/A | X-ray Chest         | Cardiac Arrhythmia(Type : Atrial Fibrillation) |
| 79 | #N/A | X-ray Shoulder      | Joint Impingement(Type : Soft Tissue)          |
| 80 | #N/A | MR Shoulder         | Joint Impingement(Type : Soft Tissue)          |
| 81 | #N/A | X-ray Foot          | Fracture                                       |
| 82 | #N/A | X-ray Chest         | Pulmonary Edema                                |
| 83 | #N/A | X-ray Lumbar Spine  | Spondylolisthesis                              |
| 84 | #N/A | X-ray Foot          | Arthritis(Type : Osteoarthritis)               |
| 85 | #N/A | X-ray Knee          | Fracture                                       |
| 86 | #N/A | X-ray Chest         | Respiratory Tract Infection                    |
| 87 | #N/A | X-ray Knee          | Arthritis(Type : Osteoarthritis)               |
| 88 | #N/A | X-ray Shoulder      | Other: Tendinitis                              |
| 89 | #N/A | CT Head             | Other: brain tumor                             |
| 90 | #N/A | US Renal            | Acute Glomerulonephritis                       |
| 91 | #N/A | X-ray Knee          | Arthritis(Type : Osteoarthritis)               |
| 92 | #N/A | X-ray Chest         | Pulmonary Edema                                |
