# Supplementary material
Source: PubMed Central journal article supplement (PMC3078662)

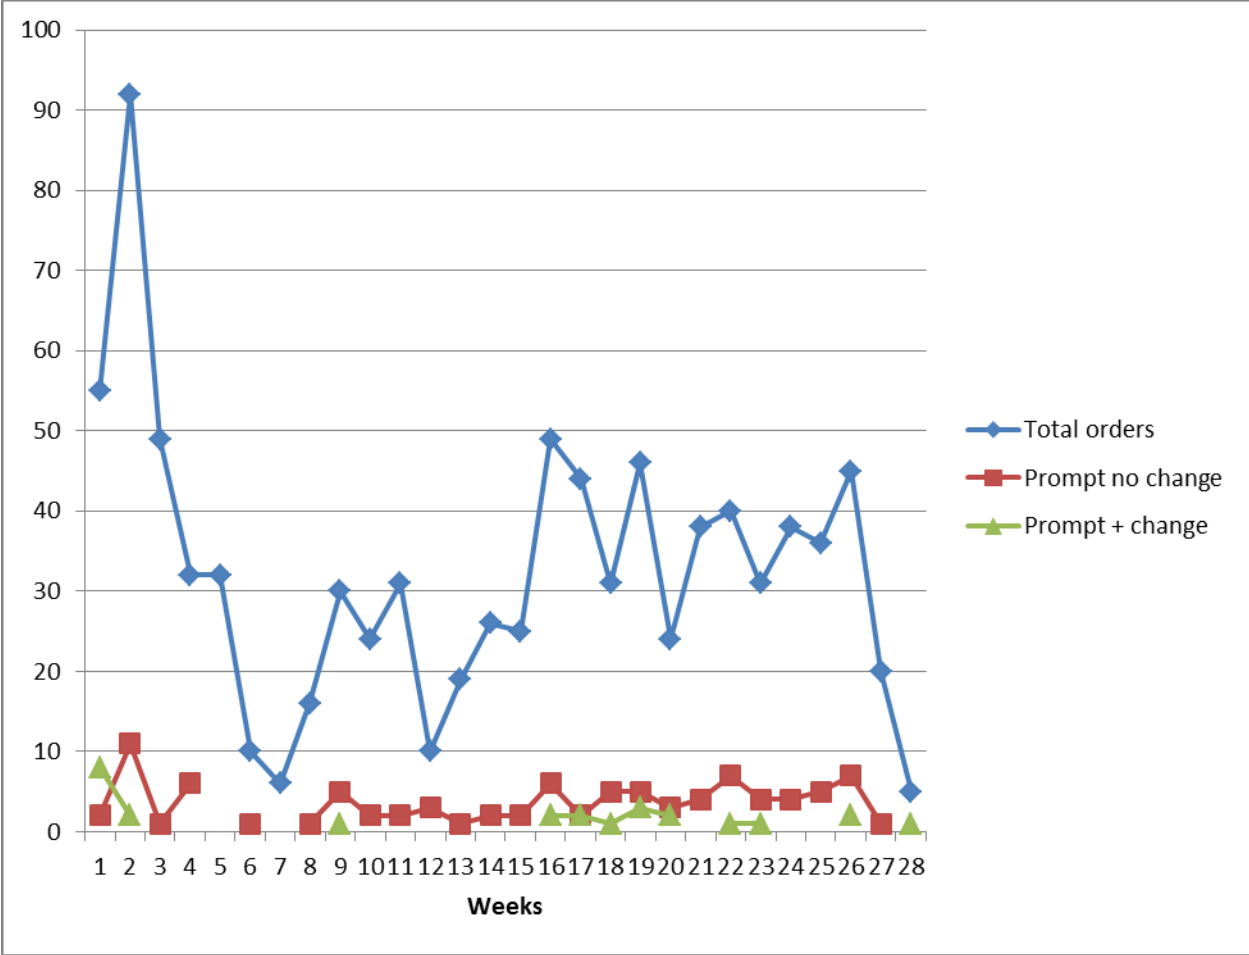

**APPENDIX 3: LINE GRAPH OF DSS USE AND RESPONSE**

| week # | total orders | Prompt + no change | Prompt + change |
|--------|--------------|--------------------|-----------------|
| 1      | 55           | 2                  | 8               |
| 2      | 92           | 11                 | 2               |
| 3      | 49           | 1                  |                 |
| 4      | 32           | 6                  |                 |
| 5      | 32           |                    |                 |
| 6      | 10           | 1                  |                 |
| 7      | 6            |                    |                 |
| 8      | 16           | 1                  |                 |
| 9      | 30           | 5                  | 1               |
| 10     | 24           | 2                  |                 |
| 11     | 31           | 2                  |                 |
| 12     | 10           | 3                  |                 |
| 13     | 19           | 1                  |                 |
| 14     | 26           | 2                  |                 |
| 15     | 25           | 2                  |                 |
| 16     | 49           | 6                  | 2               |
| 17     | 44           | 2                  | 2               |
| 18     | 31           | 5                  | 1               |
| 19     | 46           | 5                  | 3               |
| 20     | 24           | 3                  | 2               |
| 21     | 38           | 4                  |                 |
| 22     | 40           | 7                  | 1               |
| 23     | 31           | 4                  | 1               |
| 24     | 38           | 4                  |                 |
| 25     | 36           | 5                  |                 |
| 26     | 45           | 7                  | 2               |
| 27     | 20           | 1                  |                 |
| 28     | 5            |                    | 1               |

Supplement: supp_18.3.267_JAMIA_Appendix3_000049.pdf [file supp_18.3.267_JAMIA_Appendix3_000049.pdf]
